# Supplementary material
Source: PubMed Central journal article supplement (PMC4957670)

**Appendix A: Line properties**

Table A.1: Line transitions detected at 3 mm. H: Lines presenting hyperfile structure.

| $\nu_{rest}$ (GHz) | Molecule                      | Transition                                            | $T_A^*$ (mK) | Area (K km/s) | Notes |
|--------------------|-------------------------------|-------------------------------------------------------|--------------|---------------|-------|
| 83.688093          | SO <sub>2</sub>               | 8 <sub>1,7</sub> –8 <sub>0,8</sub>                    | 12.5 ± 1.2   | 0.55          |       |
| 84.746170          | <sup>30</sup> SiO             | 2–1                                                   | 84.0 ± 1.3   | 4.89          |       |
| 85.759199          | <sup>29</sup> SiO             | 2–1                                                   | 103.0 ± 0.8  | 6.13          |       |
| 86.093950          | SO                            | 2 <sub>2</sub> –1 <sub>1</sub>                        | 8.9 ± 1.27   | 0.4           |       |
| 86.339922          | H <sup>13</sup> CN            | 1–0                                                   | 37.4 ± 1.2   | 2.4           |       |
| 86.846960          | SiO                           | 2–1                                                   | 666.2 ± 0.9  | 34.32         |       |
| 88.631602          | HCN                           | 1–0                                                   | 234.2 ± 0.9  | 14.6          |       |
| 89.188525          | HCO <sup>+</sup>              | 1–0                                                   | 3.9 ± 1.3    | 0.24          |       |
| 90.663568          | HNC                           | 1–0                                                   | 21.9 ± 0.9   | 1.29          |       |
| 90.771564          | SiS                           | 5–4                                                   | 4.4 ± 0.8    | 0.287         |       |
| 93.173392          | N <sub>2</sub> H <sup>+</sup> | 1–0                                                   | 5.9 ± 0.3    | 0.42          |       |
| 93.979770          | PN                            | 2–1                                                   | 7.0 ± 1.0    | 0.46          |       |
| 96.741375          | CH <sub>3</sub> OH            | 2–1                                                   | 3.2 ± 0.6    | 0.15          |       |
| 97.715317          | <sup>34</sup> SO              | 2 <sub>3</sub> –1 <sub>2</sub>                        | 5.1 ± 0.5    | 0.27          |       |
| 97.980953          | CS                            | 2–1                                                   | 13.9 ± 0.3   | 0.825         |       |
| 99.299870          | SO                            | 2 <sub>3</sub> –1 <sub>2</sub>                        | 89.2 ± 0.6   | 3.84          |       |
| 104.029418         | SO <sub>2</sub>               | 3 <sub>1,3</sub> –2 <sub>0,2</sub>                    | 39.1 ± 0.6   | 1.71          |       |
| 104.239295         | SO <sub>2</sub>               | 10 <sub>1,9</sub> –10 <sub>0,10</sub>                 | 8.6 ± 0.3    | 0.43          |       |
| 108.924301         | SiS                           | 6–5                                                   | 9.2 ± 0.7    | 0.392         |       |
| 109.252220         | SO                            | 3 <sub>2</sub> –2 <sub>1</sub>                        | 12.7 ± 1.3   | 0.65          |       |
| 110.201354         | <sup>13</sup> CO              | 1–0                                                   | 57.1 ± 1.4   | 3.42          |       |
| 113.123370         | CN                            | 1 <sub>1/2,1/2</sub> –0 <sub>1/2,1/2</sub>            | 16.5 ± 1.9   | 3.48          | H     |
| 113.144157         | CN                            | 1 <sub>1/2,1/2</sub> –0 <sub>1/2,3/2</sub>            | –            | –             | H     |
| 113.170492         | CN                            | 1 <sub>1/2,3/2</sub> –0 <sub>1/2,1/2</sub>            | –            | –             | H     |
| 113.191279         | CN                            | 1 <sub>1/2,3/2</sub> –0 <sub>1/2,3/2</sub>            | –            | –             | H     |
| 113.488120         | CN                            | 1 <sub>3/2,3/2</sub> –0 <sub>1/2,1/2</sub>            | –            | –             | H     |
| 113.490970         | CN                            | 1 <sub>3/2,5/2</sub> –0 <sub>1/2,3/2</sub>            | –            | –             | H     |
| 113.499644         | CN                            | 1 <sub>3/2,1/2</sub> –0 <sub>1/2,1/2</sub>            | –            | –             | H     |
| 113.508907         | CN                            | 1 <sub>3/2,3/2</sub> –0 <sub>1/2,3/2</sub>            | –            | –             | H     |
| 113.520432         | CN                            | 1 <sub>3/2,1/2</sub> –0 <sub>1/2,3/2</sub>            | –            | –             | H     |
| 115.153935         | NS                            | Π <sup>+</sup> 5/2 <sub>7/2</sub> –3/2 <sub>5/2</sub> | 30.6 ± 2.7   | 2.09          | H     |
| 115.156812         | NS                            | Π <sup>+</sup> 5/2 <sub>5/2</sub> –3/2 <sub>3/2</sub> | –            | –             | H     |
| 115.162982         | NS                            | Π <sup>+</sup> 5/2 <sub>3/2</sub> –3/2 <sub>1/2</sub> | –            | –             | H     |
| 115.185336         | NS                            | Π <sup>+</sup> 5/2 <sub>3/2</sub> –3/2 <sub>3/2</sub> | –            | –             | H     |
| 115.191456         | NS                            | Π <sup>+</sup> 5/2 <sub>5/2</sub> –3/2 <sub>5/2</sub> | –            | –             | H     |
| 115.271202         | CO                            | 1–0                                                   | 657.5 ± 0.9  | 42.8          |       |
| 115.556253         | NS                            | Π <sup>–</sup> 5/2 <sub>7/2</sub> –3/2 <sub>5/2</sub> | 21.8 ± 3.0   | 1.52          | H     |
| 115.570763         | NS                            | Π <sup>–</sup> 5/2 <sub>5/2</sub> –3/2 <sub>3/2</sub> | –            | –             | H     |
| 115.571954         | NS                            | Π <sup>–</sup> 5/2 <sub>3/2</sub> –3/2 <sub>1/2</sub> | –            | –             | H     |

Table A.2: Line transitions detected at 1 mm. H: Lines presenting hyperfile structure. 8 MHz: Spectral resolution degraded to 8 Mhz to increase the S/N ratio.

| $\nu_{rest}$ (GHz) | Molecule           | Transition                                             | $T_A^*$ (mK) | Area (K km/s) | Notes |
|--------------------|--------------------|--------------------------------------------------------|--------------|---------------|-------|
| 199.672229         | SiS                | 11–10                                                  | 24 ± 2       | 0.463         |       |
| 201.751489         | Si <sup>18</sup> O | 5–4                                                    | 10.6 ± 2.5   | 0.40          |       |
| 203.391550         | SO <sub>2</sub>    | 12 <sub>0,12</sub> –11 <sub>1,11</sub>                 | 17.2 ± 2.0   | 0.82          |       |
| 206.176005         | SO                 | 5 <sub>4</sub> –4 <sub>3</sub>                         | 40.3 ± 2.17  | 1.8           |       |
| 207.436051         | NS                 | Π <sup>+</sup> 9/2 <sub>11/2</sub> –7/2 <sub>9/2</sub> | 48.8 ± 3.4   | 1.68          | H     |
| 207.436636         | NS                 | Π <sup>+</sup> 9/2 <sub>7/2</sub> –9/2 <sub>7/2</sub>  | –            | –             | H     |
| 207.438692         | NS                 | Π <sup>+</sup> 9/2 <sub>7/2</sub> –7/2 <sub>5/2</sub>  | –            | –             | H     |
| 207.566407         | U                  | –                                                      | 12.0 ± 3.7   | 0.50          |       |
| 207.777535         | NS                 | Π <sup>–</sup> 9/2 <sub>9/2</sub> –7/2 <sub>9/2</sub>  | 53.2 ± 3.2   | 1.65          | H     |
| 207.792951         | NS                 | Π <sup>–</sup> 9/2 <sub>7/2</sub> –7/2 <sub>7/2</sub>  | –            | –             | H     |
| 207.834866         | NS                 | Π <sup>–</sup> 9/2 <sub>11/2</sub> –7/2 <sub>9/2</sub> | –            | –             | H     |
| 207.838365         | NS                 | Π <sup>–</sup> 9/2 <sub>9/2</sub> –7/2 <sub>7/2</sub>  | –            | –             | H     |
| 208.700336         | SO <sub>2</sub>    | 3 <sub>2,2</sub> –2 <sub>2,1</sub>                     | 50.1 ± 3.8   | 2.40          |       |

Table A.2: continued.

| $\nu_{rest}$ (GHz) | Molecule           | Transition                                               | $T_A^*$ (mK)                | Area (K km/s) | Notes |
|--------------------|--------------------|----------------------------------------------------------|-----------------------------|---------------|-------|
| 211.853474         | <sup>30</sup> SiO  | 5–4                                                      | 169.7 ± 4.1                 | 8.71          |       |
| 214.385758         | <sup>29</sup> SiO  | 5–4                                                      | 118.7 ± 4.7                 | 5.67          |       |
| 215.220653         | SO                 | 5 <sub>5</sub> –4 <sub>4</sub>                           | 21.9 ± 4.9                  | 1.28          |       |
| 217.104980         | SiO                | 5–4                                                      | 865.8 ± 4.2                 | 42.37         |       |
| 217.817663         | SiS                | 12–11                                                    | 10 ± 2                      | 0.334         |       |
| 218.440050         | CH <sub>3</sub> OH | 4–3                                                      | 9.2 ± 2.0                   | 0.20          |       |
| 219.949442         | SO                 | 5 <sub>6</sub> –4 <sub>5</sub>                           | 138.6 ± 3.1                 | 5.70          |       |
| 220.398684         | <sup>13</sup> CO   | 2–1                                                      | 315 ± 3                     | 19.4          |       |
| 221.965220         | SO <sub>2</sub>    | 11 <sub>1,11</sub> –10 <sub>0,10</sub>                   | 22.6 ± 2.8                  | 1.05          |       |
| 226.616571         | CN                 | 2 <sub>3/2,1/2</sub> –1 <sub>1/2,3/2</sub>               | 37.2 ± 2.8                  | 3.29          | H     |
| 226.632190         | CN                 | 2 <sub>3/2,3/2</sub> –1 <sub>1/2,3/2</sub>               | –                           | –             | H     |
| 226.659558         | CN                 | 2 <sub>3/2,5/2</sub> –1 <sub>1/2,3/2</sub>               | –                           | –             | H     |
| 226.663693         | CN                 | 2 <sub>3/2,1/2</sub> –1 <sub>1/2,1/2</sub>               | –                           | –             | H     |
| 226.679311         | CN                 | 2 <sub>3/2,3/2</sub> –1 <sub>1/2,1/2</sub>               | –                           | –             | H     |
| 226.874191         | CN                 | 2 <sub>5/2,5/2</sub> –1 <sub>3/2,3/2</sub>               | –                           | –             | H     |
| 226.874781         | CN                 | 2 <sub>5/2,7/2</sub> –1 <sub>3/2,5/2</sub>               | –                           | –             | H     |
| 226.887420         | CN                 | 2 <sub>5/2,3/2</sub> –1 <sub>3/2,3/2</sub>               | –                           | –             | H     |
| 226.892128         | CN                 | 2 <sub>5/2,5/2</sub> –1 <sub>3/2,5/2</sub>               | –                           | –             | H     |
| 226.905357         | CN                 | 2 <sub>5/2,3/2</sub> –1 <sub>3/2,5/2</sub>               | –                           | –             | H     |
| 230.538000         | CO                 | 2–1                                                      | 2.511 10 <sup>3</sup> ± 3.2 | 159           |       |
| 234.935695         | PN                 | 6–5                                                      | 13.6 ± 2.9                  | 0.45          |       |
| 235.151720         | SO <sub>2</sub>    | 4 <sub>2,2</sub> –3 <sub>1,3</sub>                       | 59.1 ± 2.1                  | 2.58          |       |
| 235.961363         | SiS                | 13–12                                                    | 13.5 ± 3.5                  | 0.43          |       |
| 241.615797         | SO <sub>2</sub>    | 5 <sub>2,4</sub> –4 <sub>1,3</sub>                       | 20.3 ± 1.9                  | 1.04          |       |
| 244.365156         | U                  | –                                                        | 9.2 ± 2.9                   | 0.61          | 8MHz  |
| 244.935557         | CS                 | 5–4                                                      | 13.5 ± 3.5                  | 0.72          |       |
| 250.436848         | NO                 | Π <sup>+</sup> 5/2 <sub>7/2</sub> –3/2 <sub>5/2</sub>    | 22.8 ± 2.4                  | 1.49          | H     |
| 250.440659         | NO                 | Π <sup>+</sup> 5/2 <sub>5/2</sub> –3/2 <sub>3/2</sub>    | –                           | –             | H     |
| 250.448530         | NO                 | Π <sup>+</sup> 5/2 <sub>3/2</sub> –3/2 <sub>1/2</sub>    | –                           | –             | H     |
| 250.475414         | NO                 | Π <sup>+</sup> 5/2 <sub>3/2</sub> –3/2 <sub>3/2</sub>    | –                           | –             | H     |
| 250.482939         | NO                 | Π <sup>+</sup> 5/2 <sub>5/2</sub> –3/2 <sub>5/2</sub>    | –                           | –             | H     |
| 250.796436         | NO                 | Π <sup>–</sup> 5/2 <sub>7/2</sub> –3/2 <sub>5/2</sub>    | 19.0 ± 2.3                  | 1.51          | H     |
| 250.815594         | NO                 | Π <sup>–</sup> 5/2 <sub>5/2</sub> –3/2 <sub>3/2</sub>    | –                           | –             | H     |
| 250.816954         | NO                 | Π <sup>–</sup> 5/2 <sub>3/2</sub> –3/2 <sub>1/2</sub>    | –                           | –             | H     |
| 251.199675         | SO <sub>2</sub>    | 13 <sub>1,13</sub> –12 <sub>0,12</sub>                   | 24.0 ± 2.5                  | 1.12          |       |
| 251.826156         | SO                 | 6 <sub>5</sub> –5 <sub>4</sub>                           | 35.9 ± 3.0                  | 1.06          |       |
| 251.912005         | U                  | 3–2                                                      | 7.0 ± 2.2                   | 0.09          |       |
| 253.968393         | NS                 | Π <sup>–</sup> 11/2 <sub>13/2</sub> –9/2 <sub>11/2</sub> | 38.3 ± 2.7                  | 1.39          | H     |
| 253.970581         | NS                 | Π <sup>–</sup> 11/2 <sub>11/2</sub> –9/2 <sub>9/2</sub>  | –                           | –             | H     |
| 254.216656         | <sup>30</sup> SiO  | 6–5                                                      | 115.3 ± 3.7                 | 4.70          |       |
| 254.280536         | SO <sub>2</sub>    | 6 <sub>3,3</sub> –6 <sub>2,4</sub>                       | 14.4 ± 3.6                  | 0.31          |       |
| 255.553302         | SO <sub>2</sub>    | 4 <sub>3,1</sub> –4 <sub>2,2</sub>                       | 14.1 ± 2.9                  | 0.51          |       |
| 255.958044         | SO <sub>2</sub>    | 3 <sub>3,1</sub> –3 <sub>2,2</sub>                       | 10.3 ± 2.6                  | 0.74          |       |
| 256.246945         | SO <sub>2</sub>    | 5 <sub>3,3</sub> –5 <sub>2,4</sub>                       | 26.0 ± 3.7                  | 0.89          |       |
| 257.099966         | SO <sub>2</sub>    | 7 <sub>3,5</sub> –7 <sub>2,6</sub>                       | 12.9 ± 2.4                  | 0.85          |       |
| 257.255216         | <sup>29</sup> SiO  | 6–5                                                      | 179.4 ± 2.6                 | 8.59          |       |
| 258.255826         | SO                 | 6 <sub>6</sub> –5 <sub>5</sub>                           | 2.7 ± 3.3                   | 1.62          |       |
| 259.011821         | H <sup>13</sup> CN | 3–2                                                      | 80.0 ± 3.3                  | 4.11          |       |
| 260.518020         | SiO                | 6–5                                                      | 959 ± 2.2                   | 47.9          |       |
| 261.259318         | HN <sup>13</sup> C | 3–2                                                      | 15.7 ± 4.8                  | 0.78          |       |
| 261.843721         | SO                 | 6 <sub>7</sub> –5 <sub>6</sub>                           | 77.5 ± 6.0                  | 2.58          |       |
| 265.886180         | HCN                | 3–2                                                      | 529.3 ± 4.1                 | 24.1          |       |
| 271.529014         | SO <sub>2</sub>    | 7 <sub>2,6</sub> –6 <sub>1,5</sub>                       | 19.9 ± 3.8                  | 0.823         |       |
| 271.981142         | HNC                | 3–2                                                      | 167.6 ± 4.6                 | 8.24          |       |

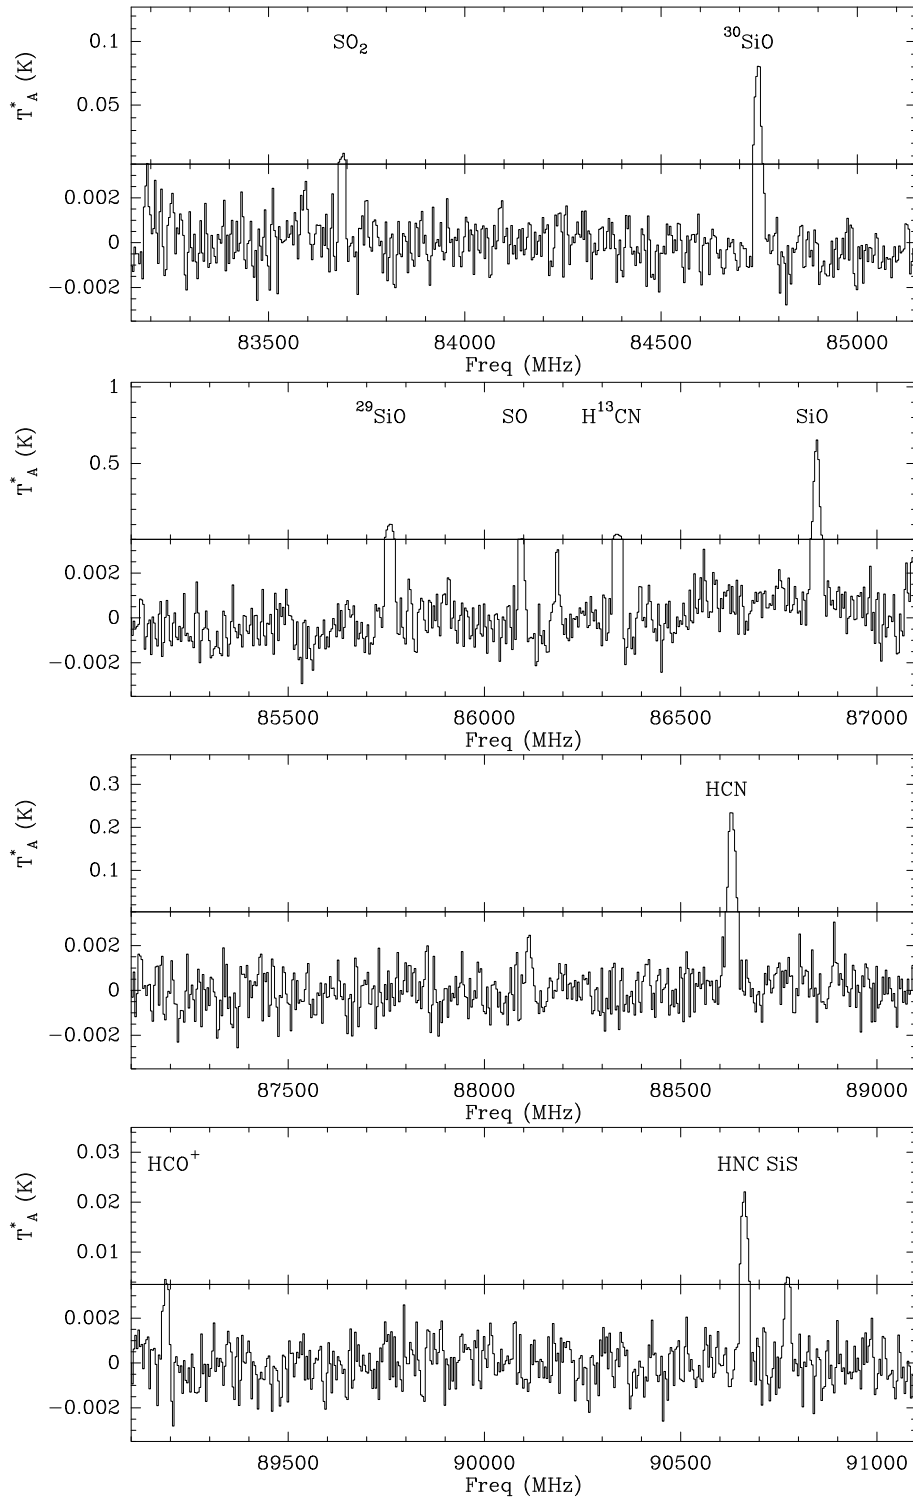

Fig. A.1: Spectral survey obtained with the IRAM 30 m telescope at the atmospheric window of 3 mm. The  $v_{\text{LSR}}$  of IRC +10420 used to calculate the frequencies of the spectra is 76 km/s.

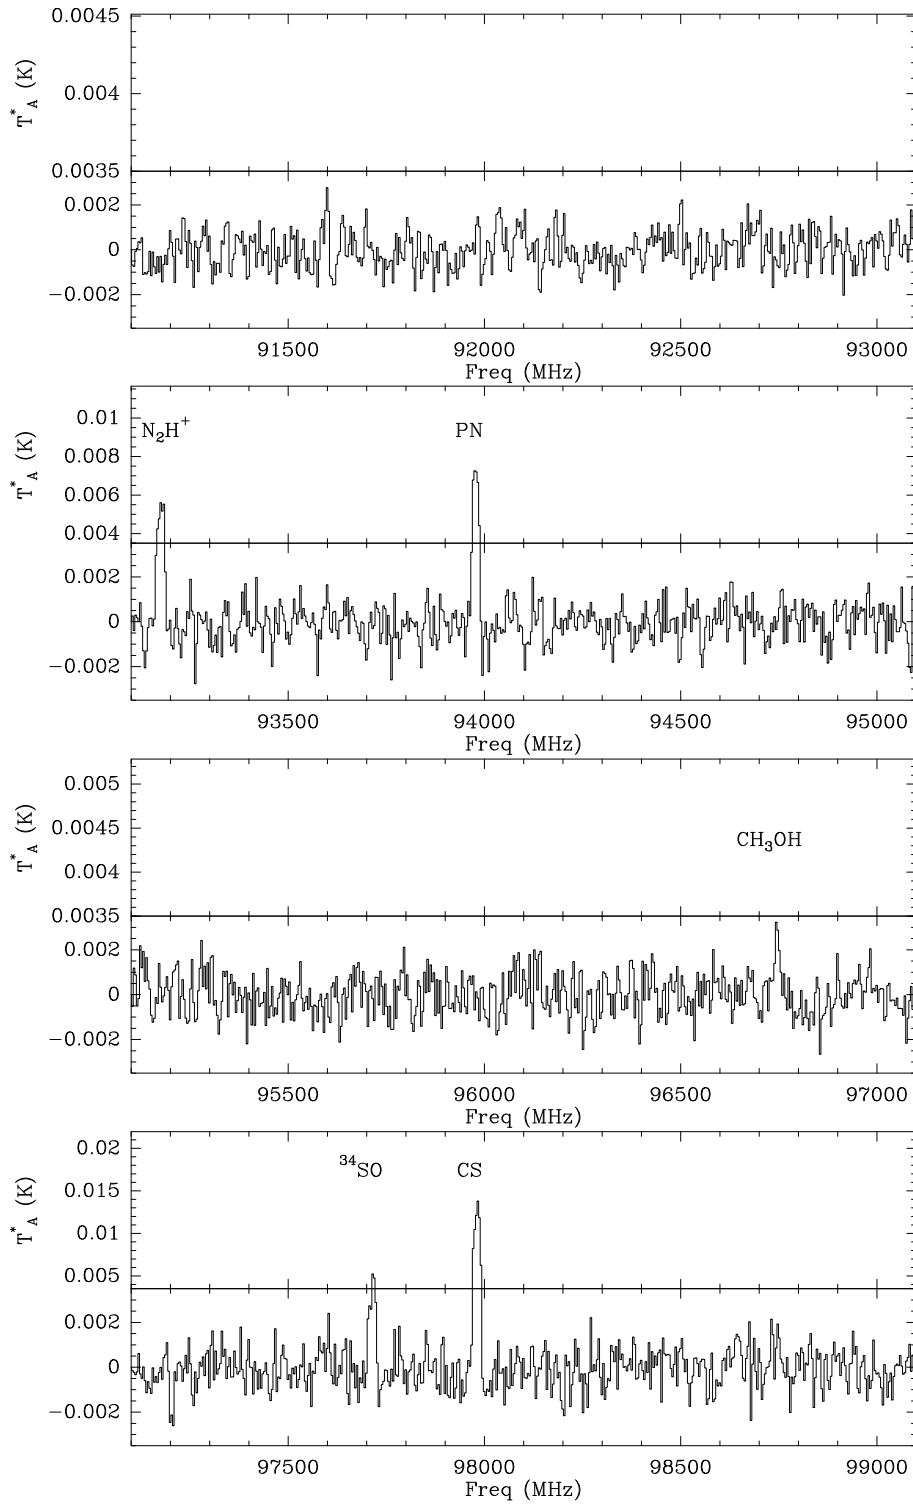

Fig. A.1: . (continued)

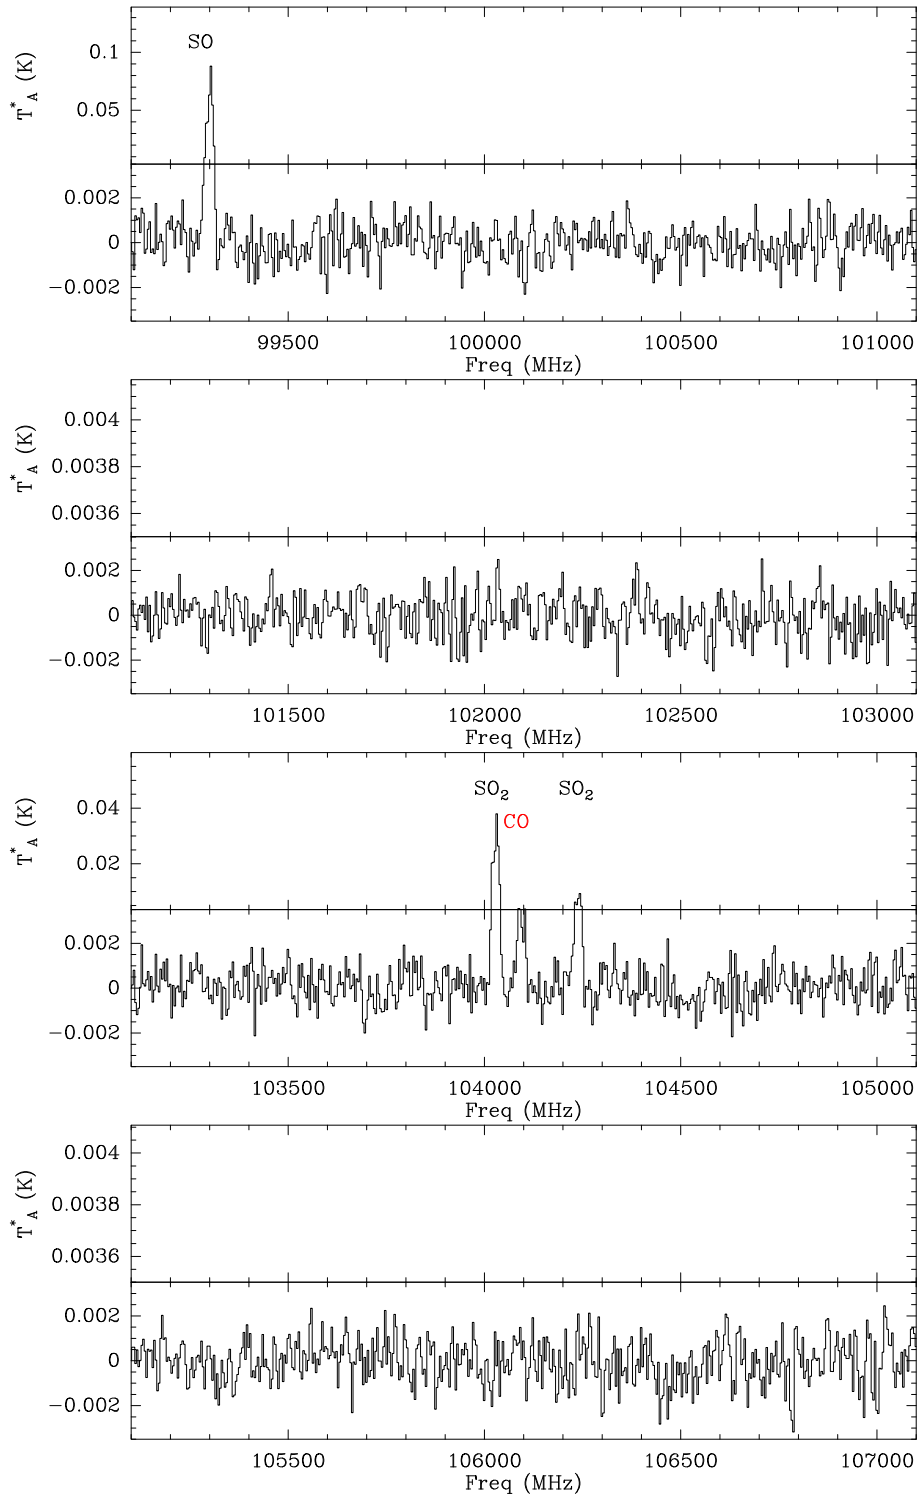

Fig. A.1: . (continued)

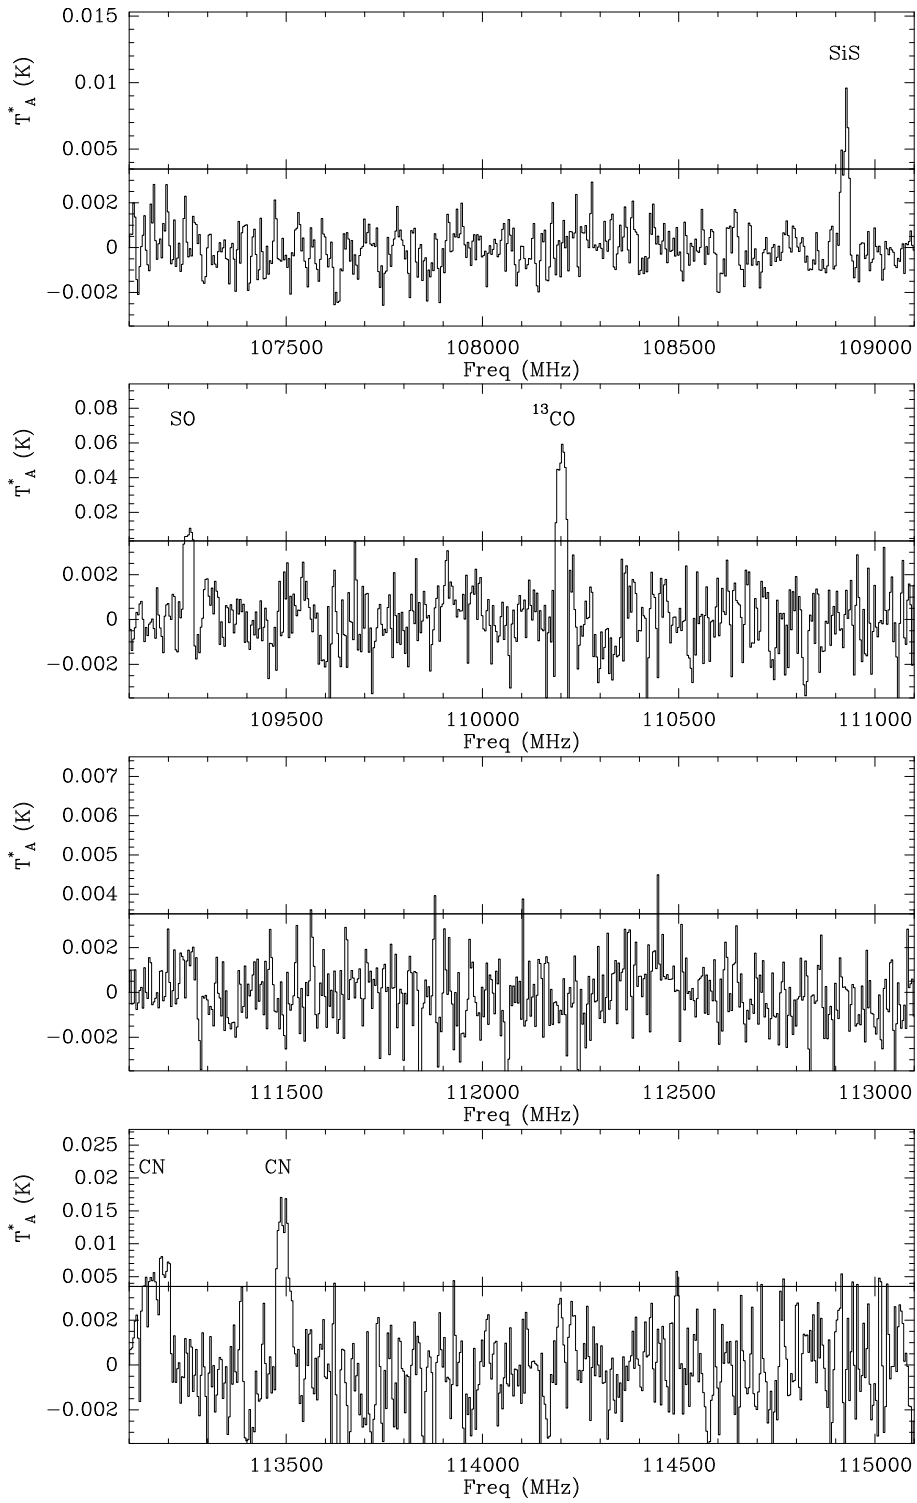

Fig. A.1: . (continued)

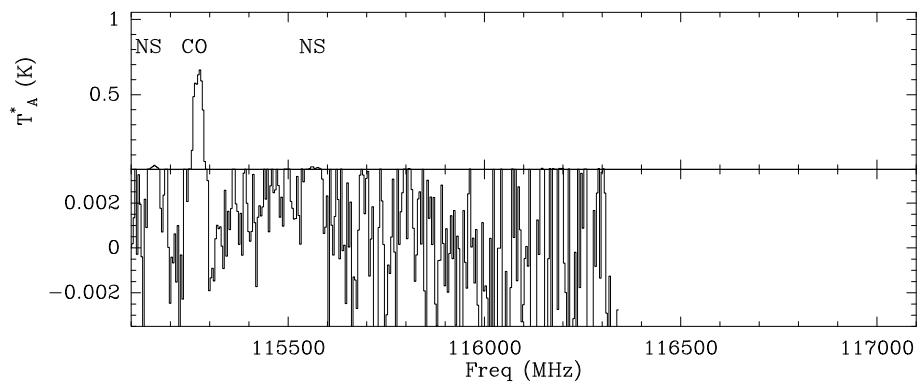

Fig. A.1: . (continued)



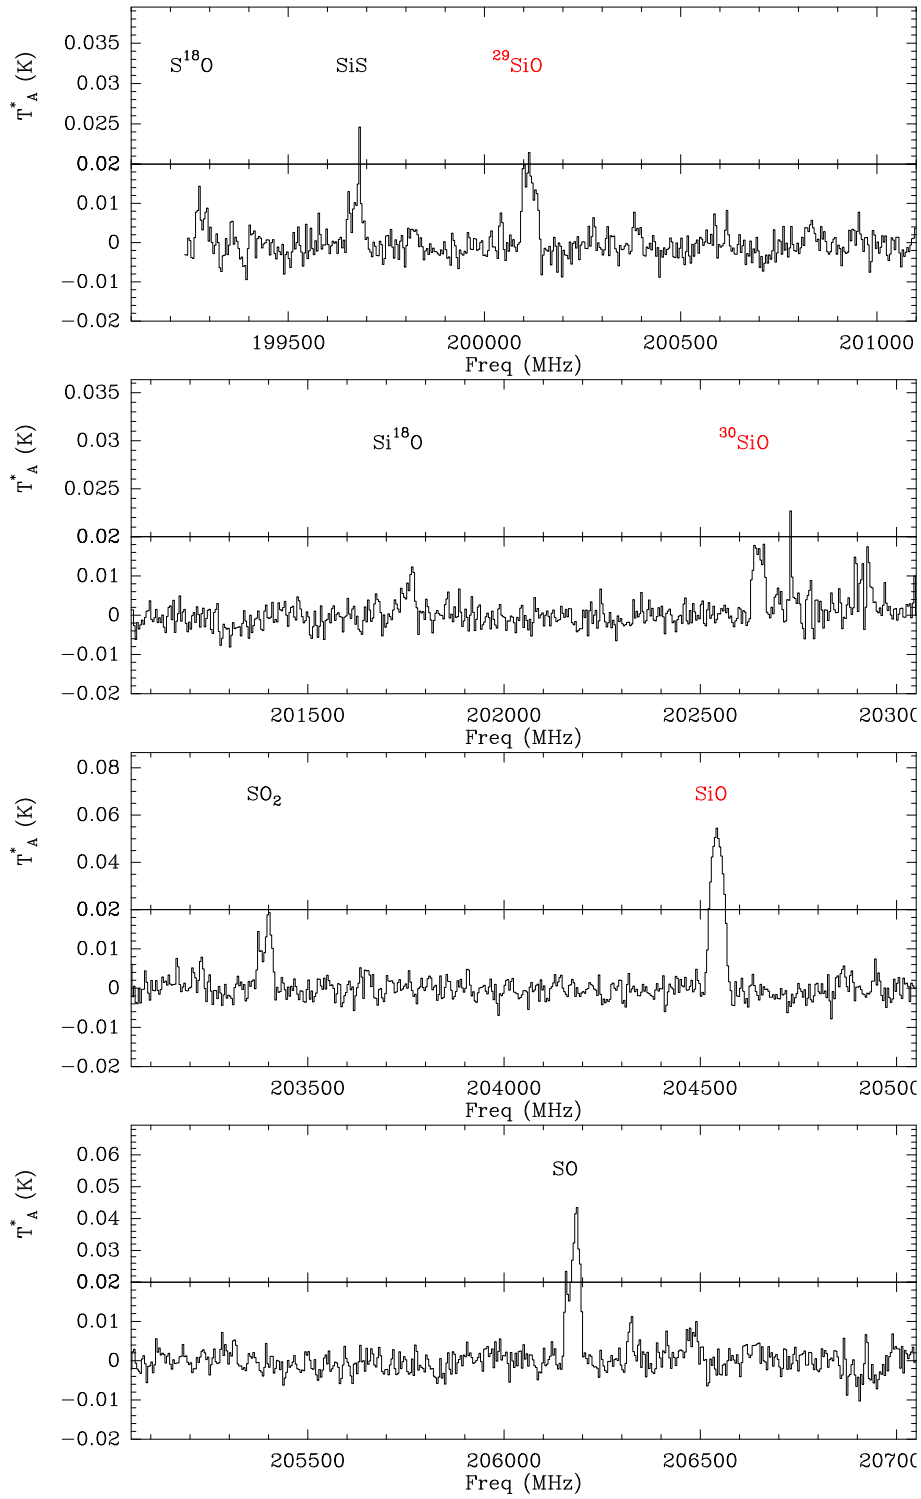

Fig. A.2: Spectral survey obtained with the IRAM 30 m telescope at the atmospheric window of 1 mm. The  $v_{LSR}$  of IRC +10420 used to calculate the frequencies of the spectra is 76 km/s.

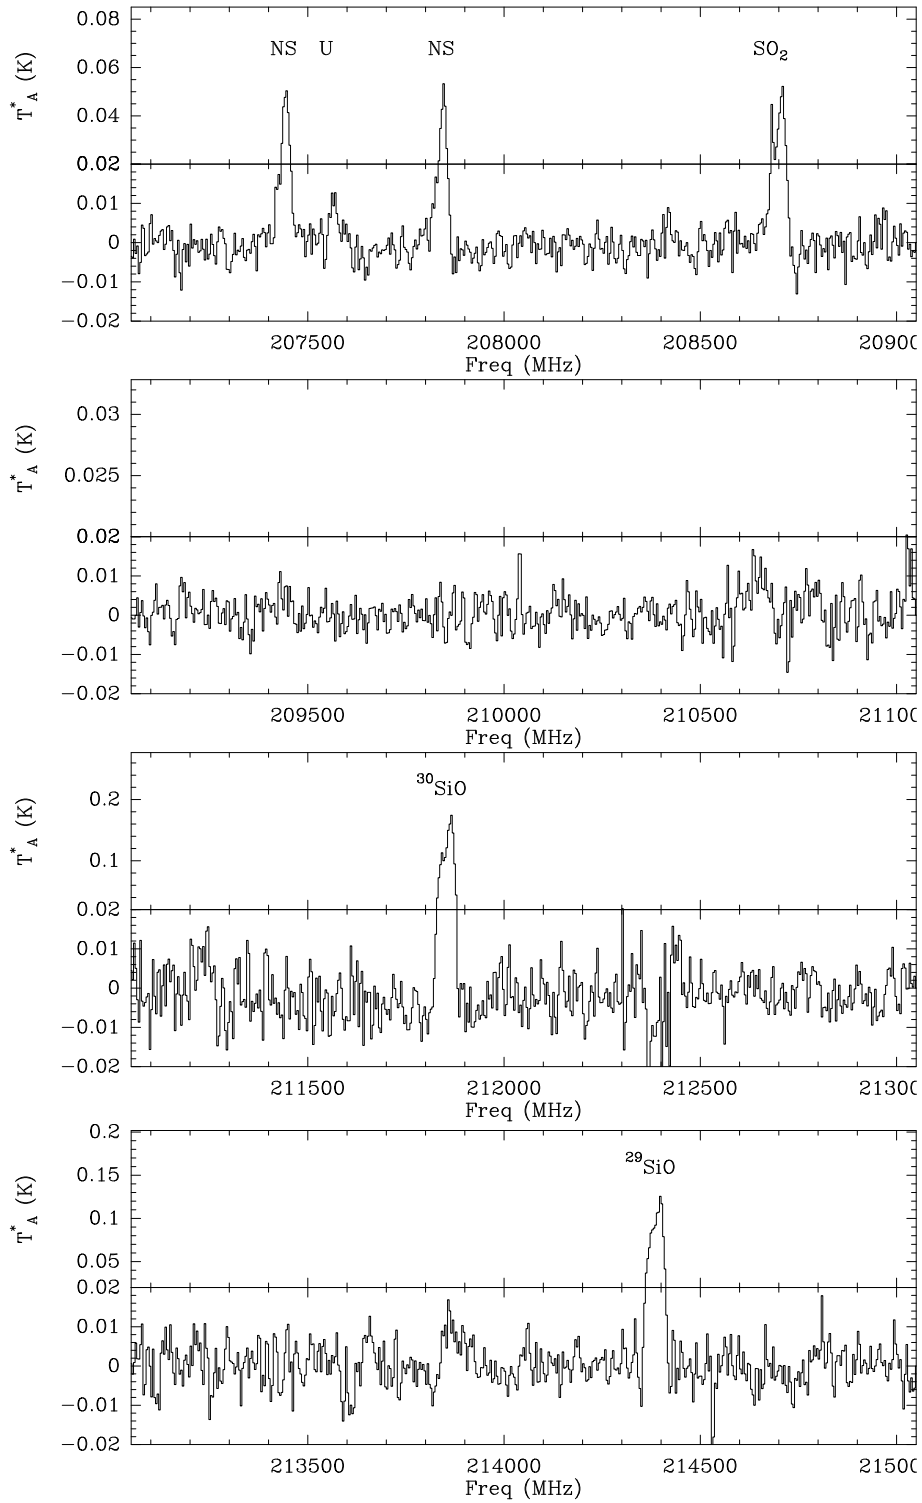

Fig. A.2: . (continued)

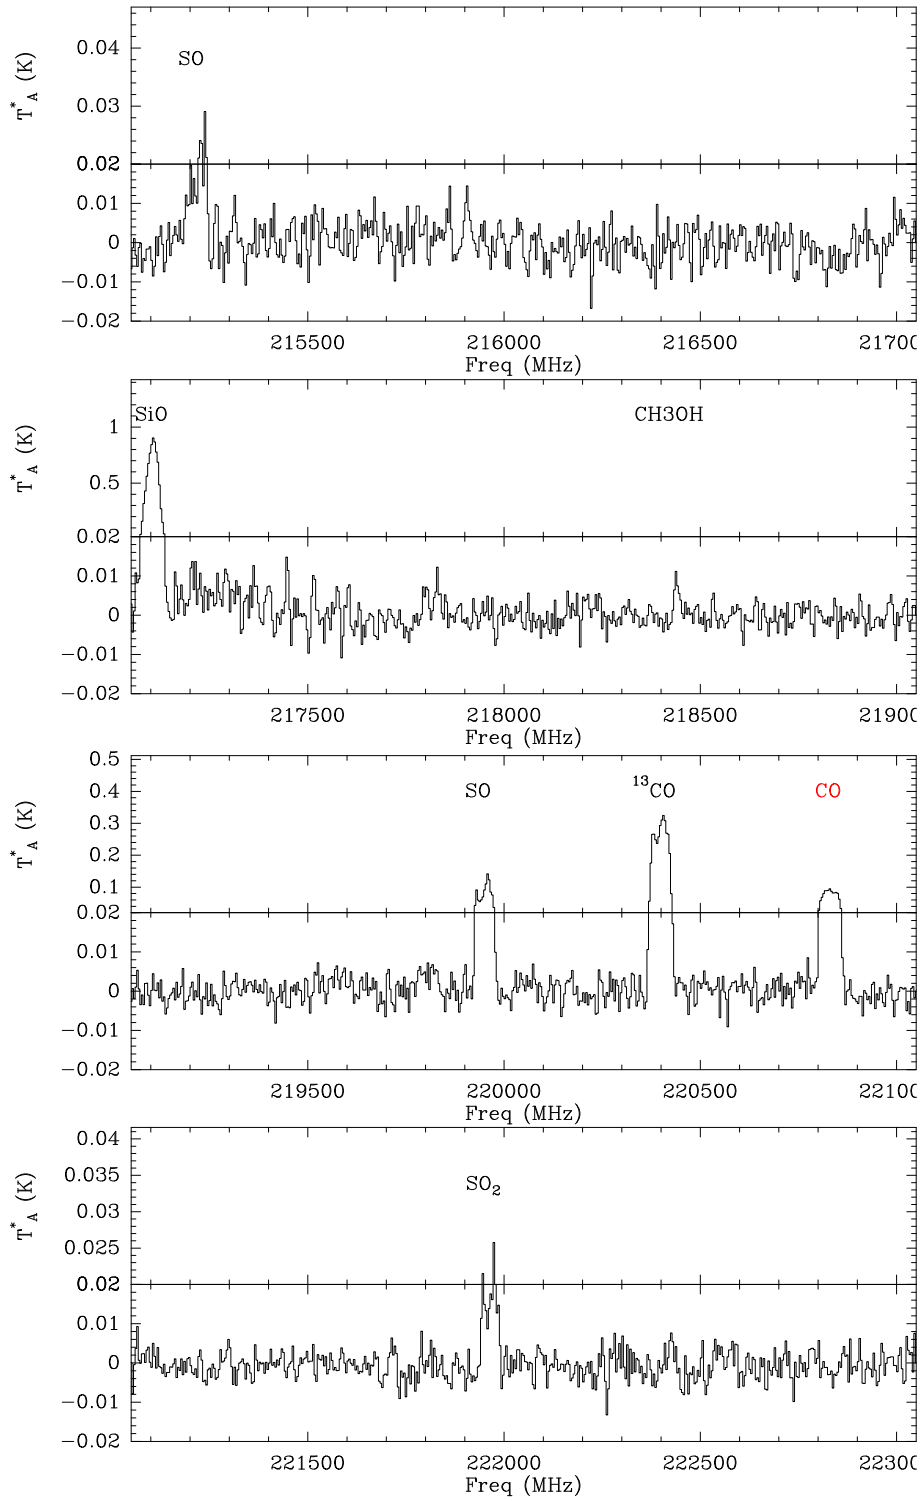

Fig. A.2: . (continued)

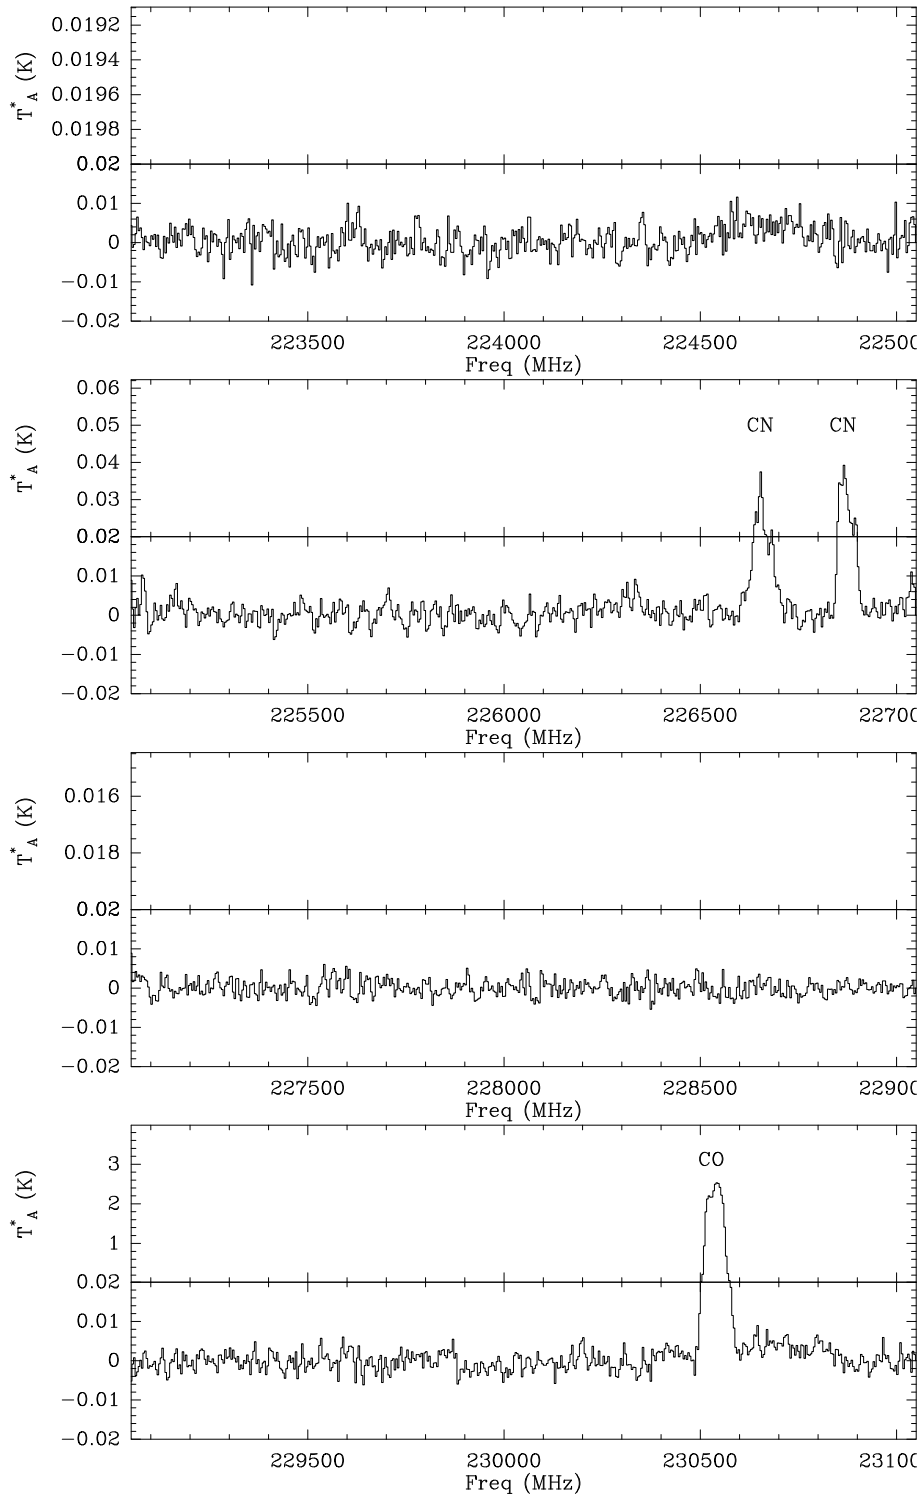

Fig. A.2: . (continued)

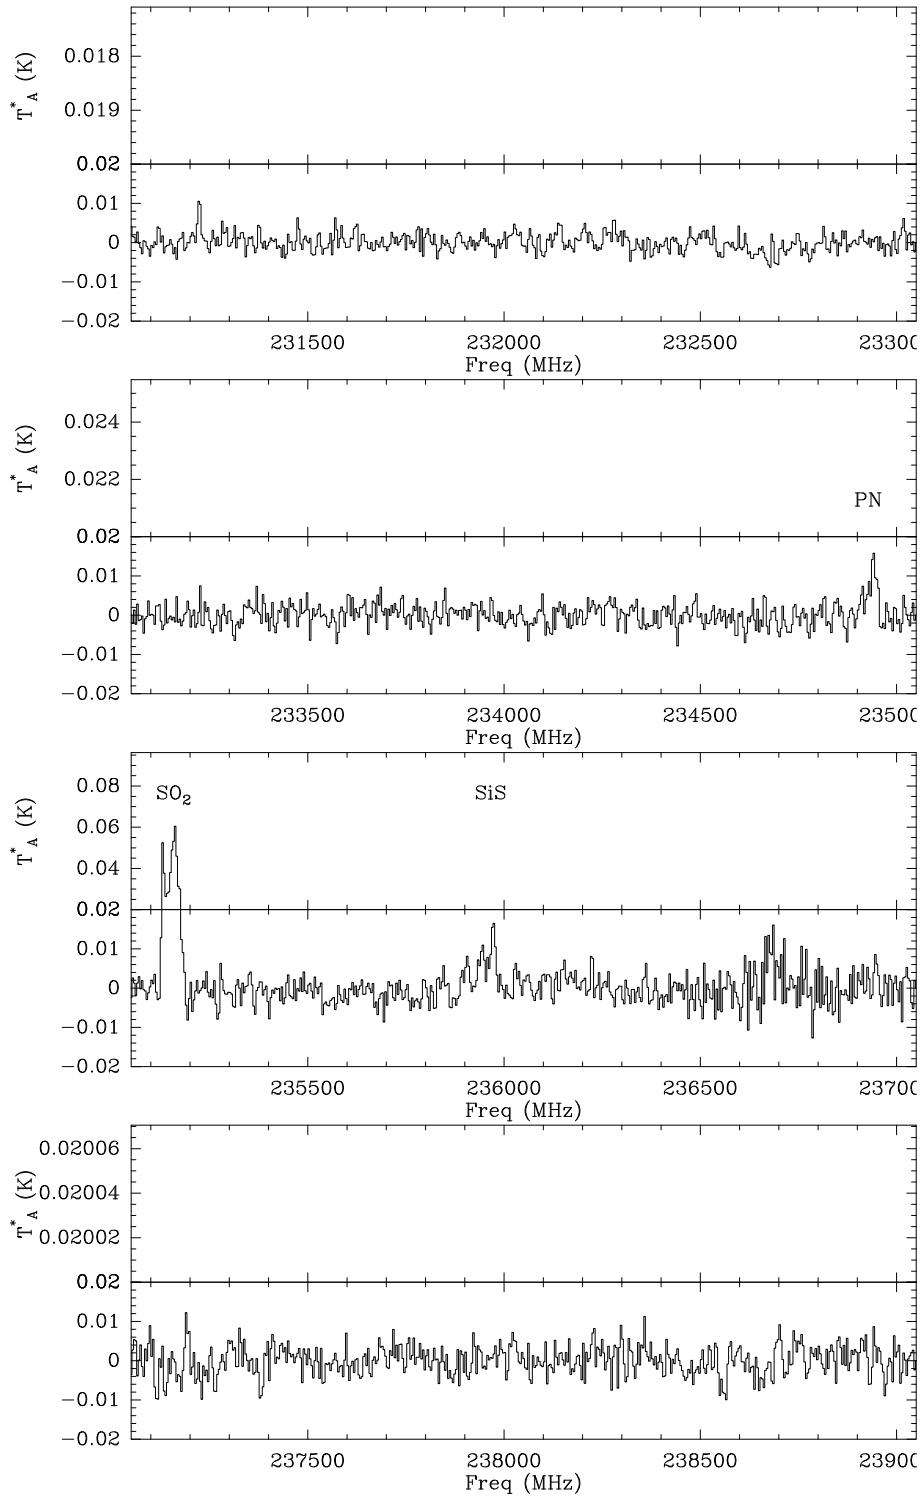

Fig. A.2: . (continued)

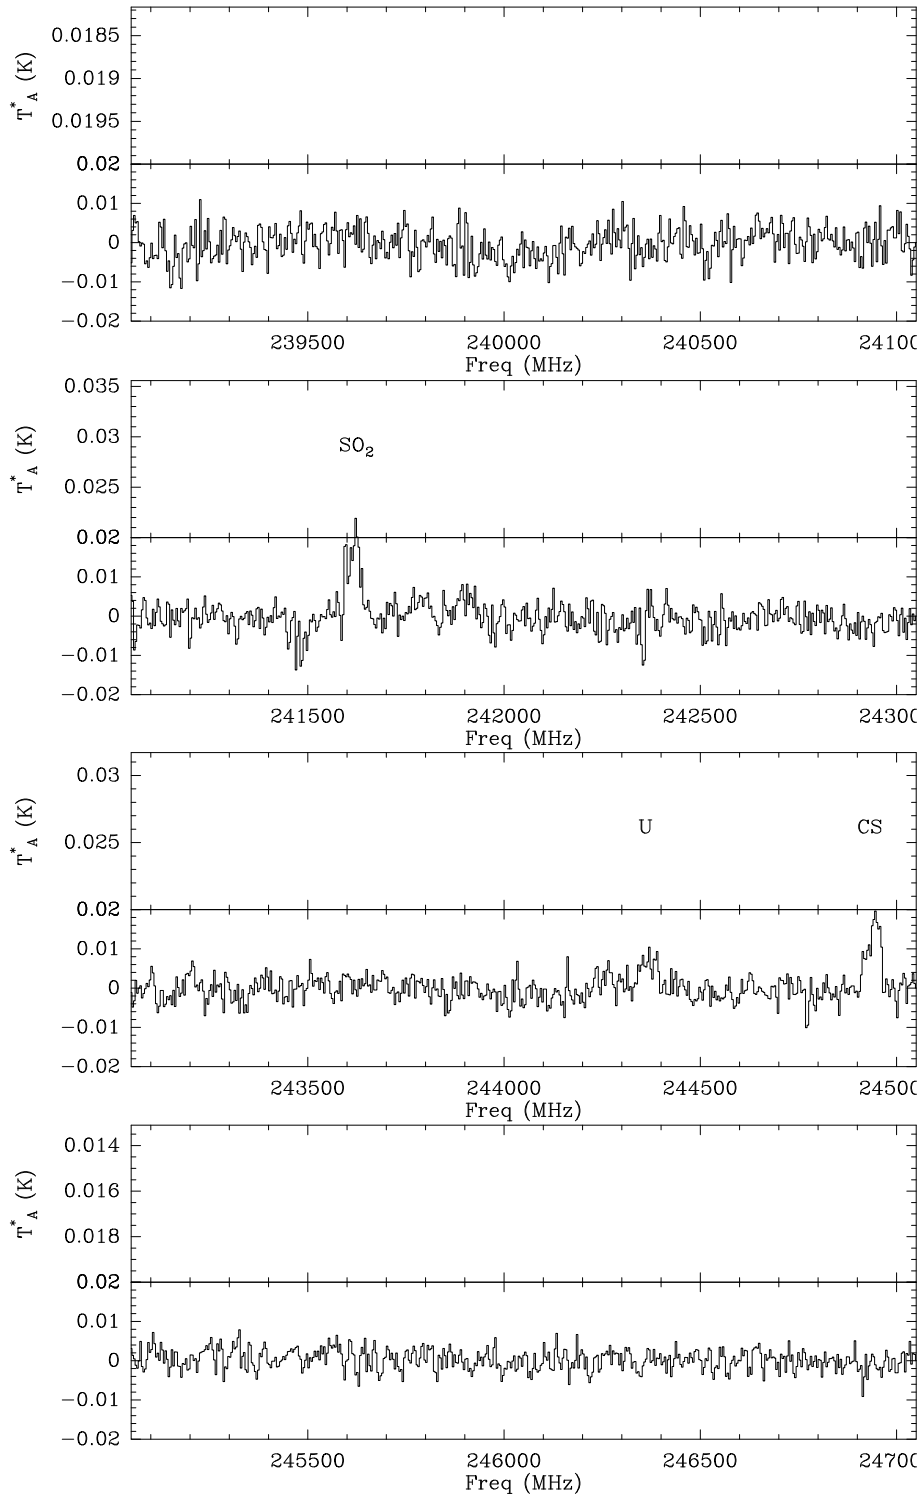

Fig. A.2: . (continued)

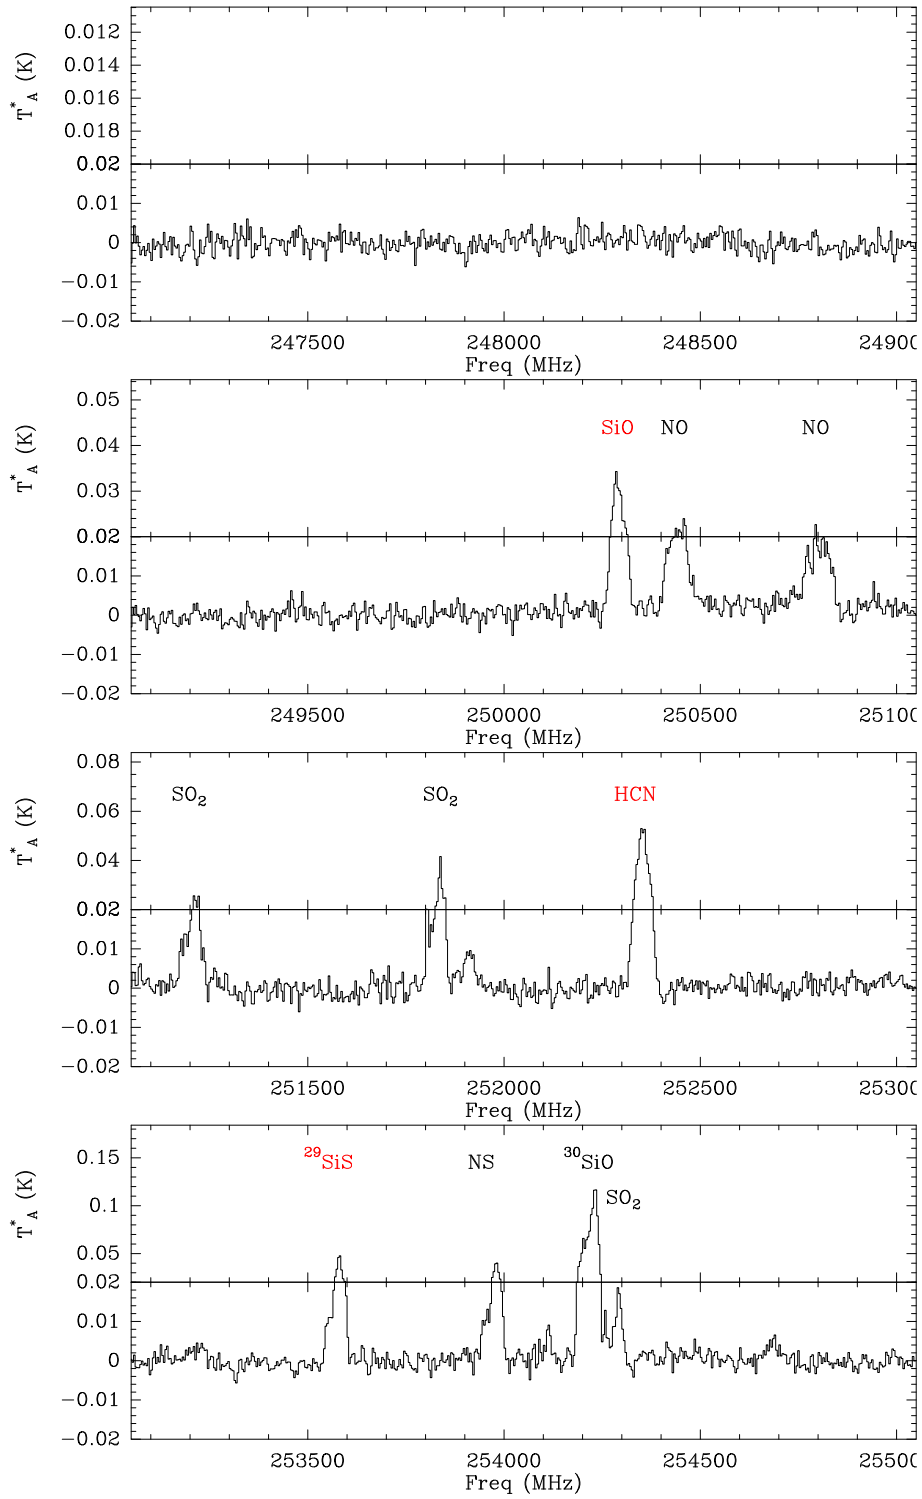

Fig. A.2: . (continued)

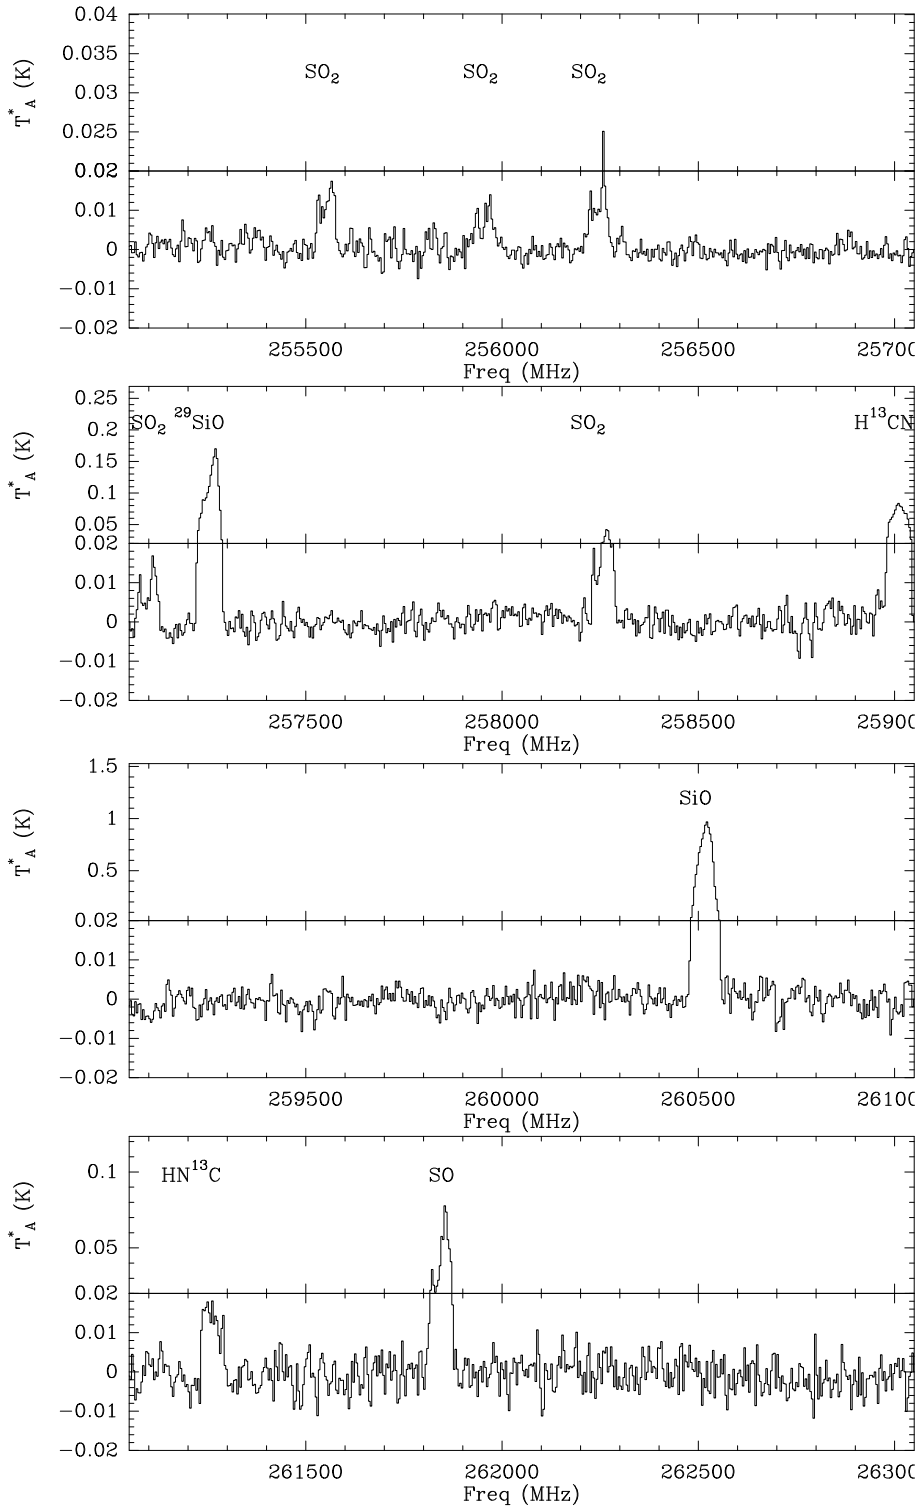

Fig. A.2: . (continued)



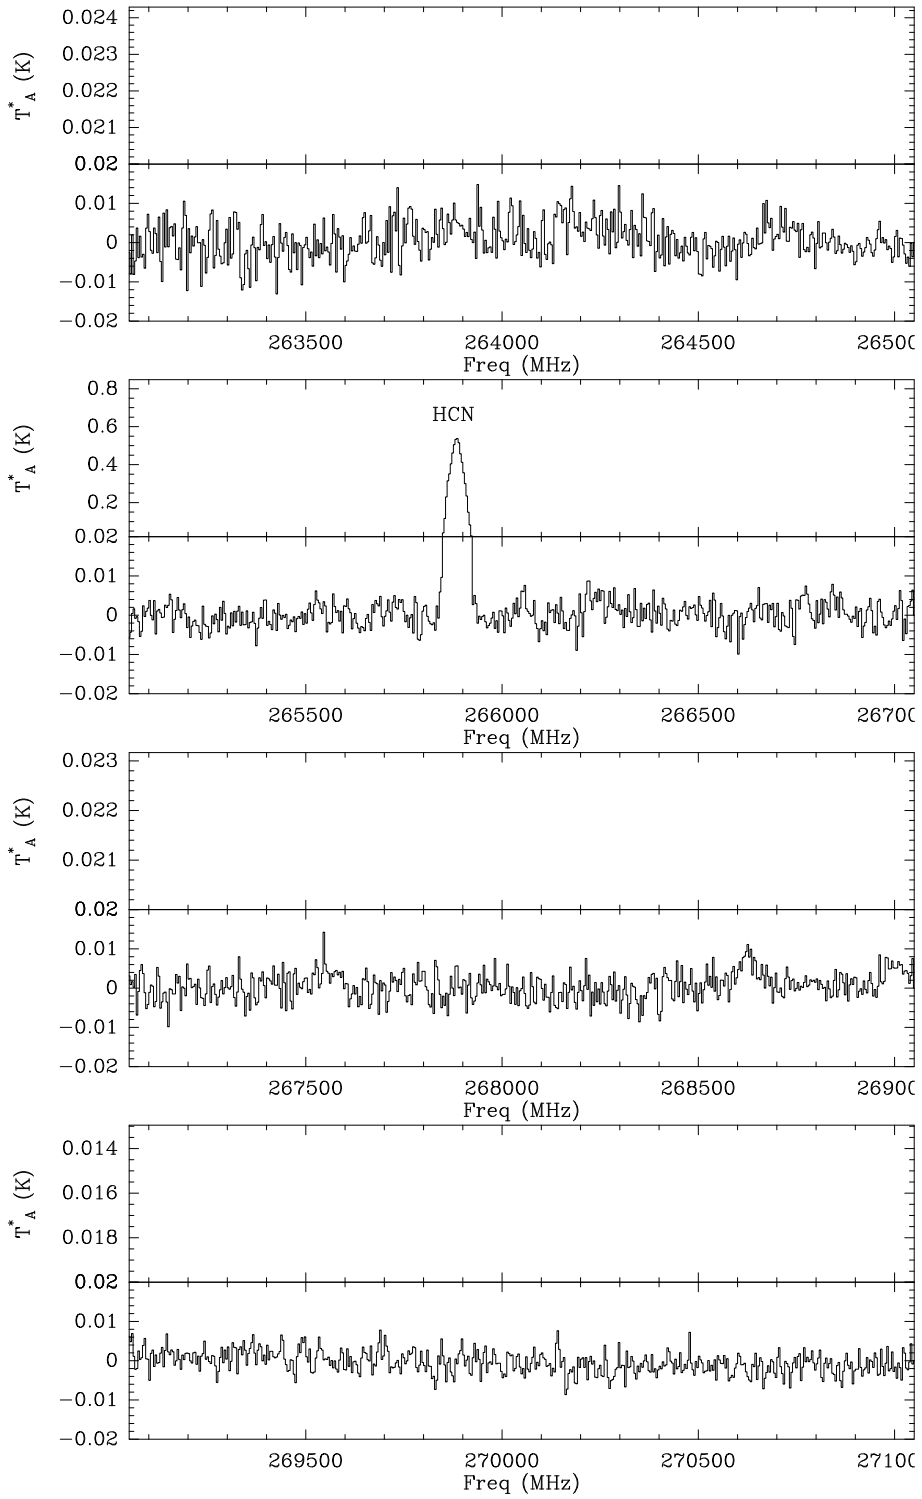

Fig. A.2: . (continued)

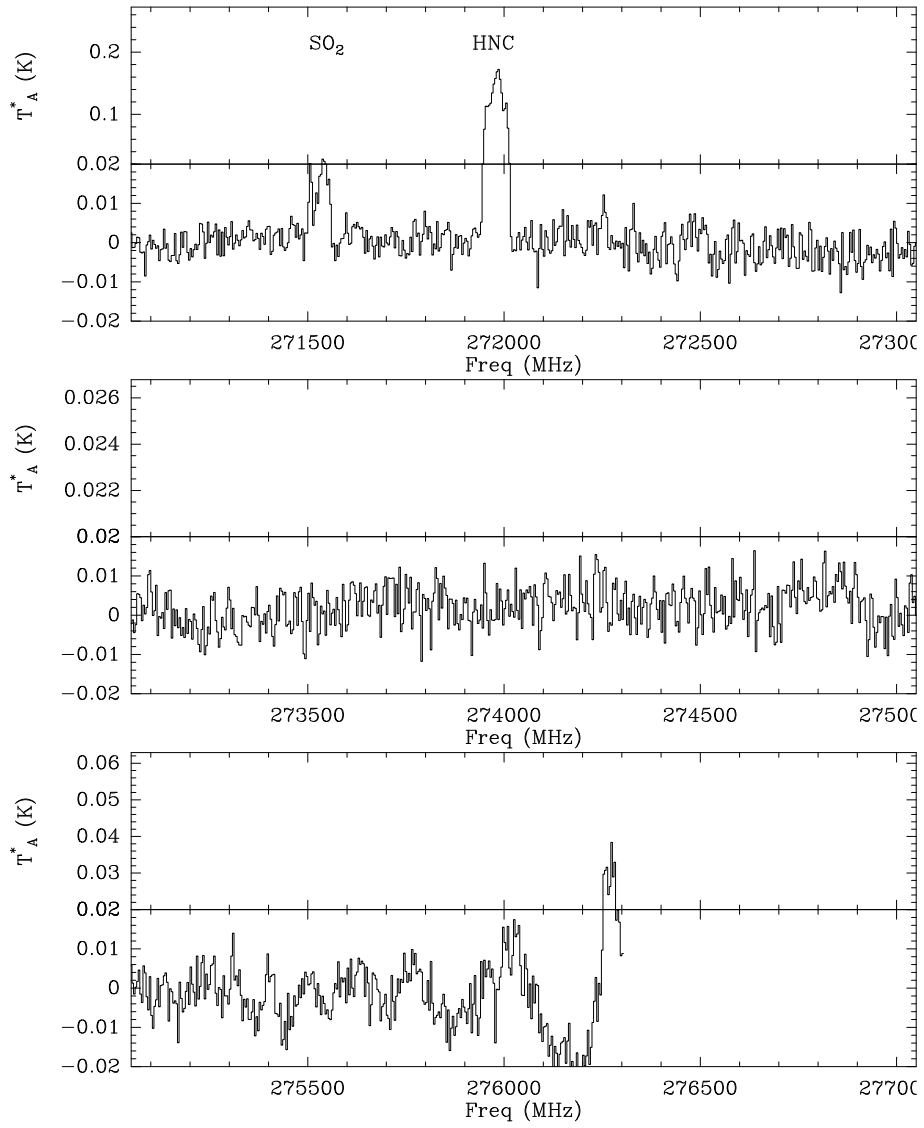

Fig. A.2: . (continued)

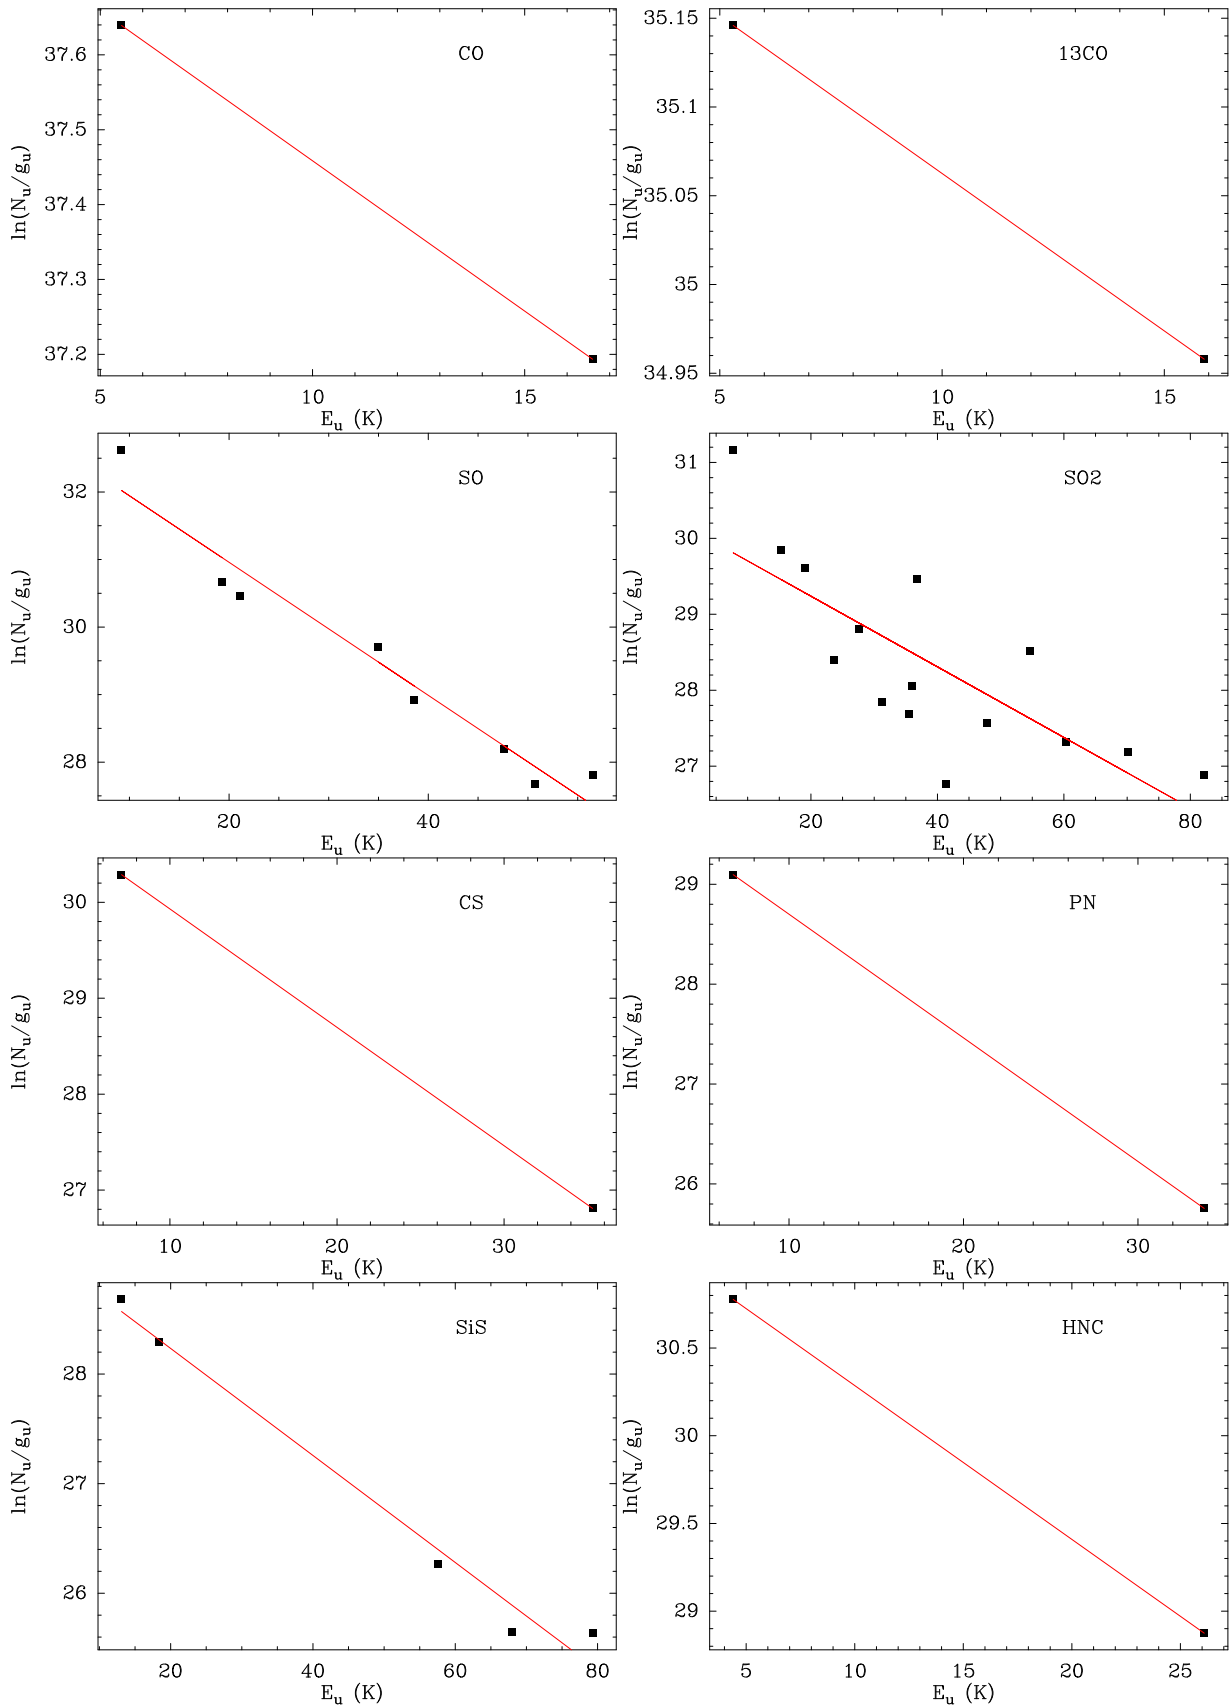

Fig. A.3: Rotational diagrams for CO, SO, SO<sub>2</sub>, CS, PN, SiS, and HNC.

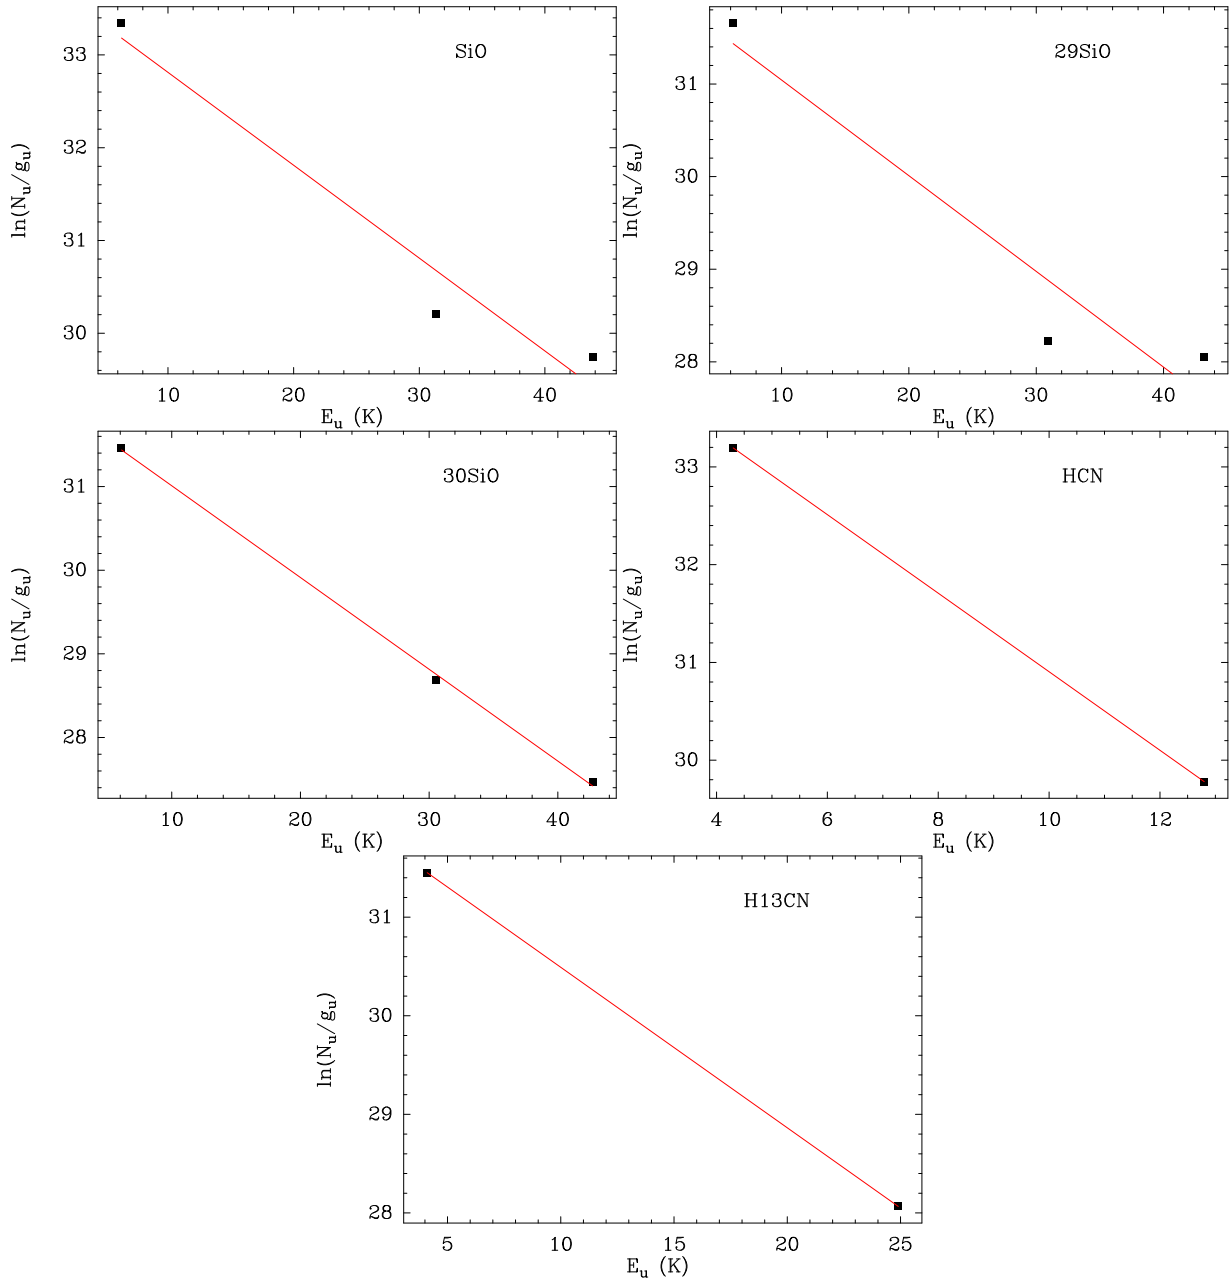

Fig. A.4: Rotational diagrams of SiO, HCN, and their isotopologues.

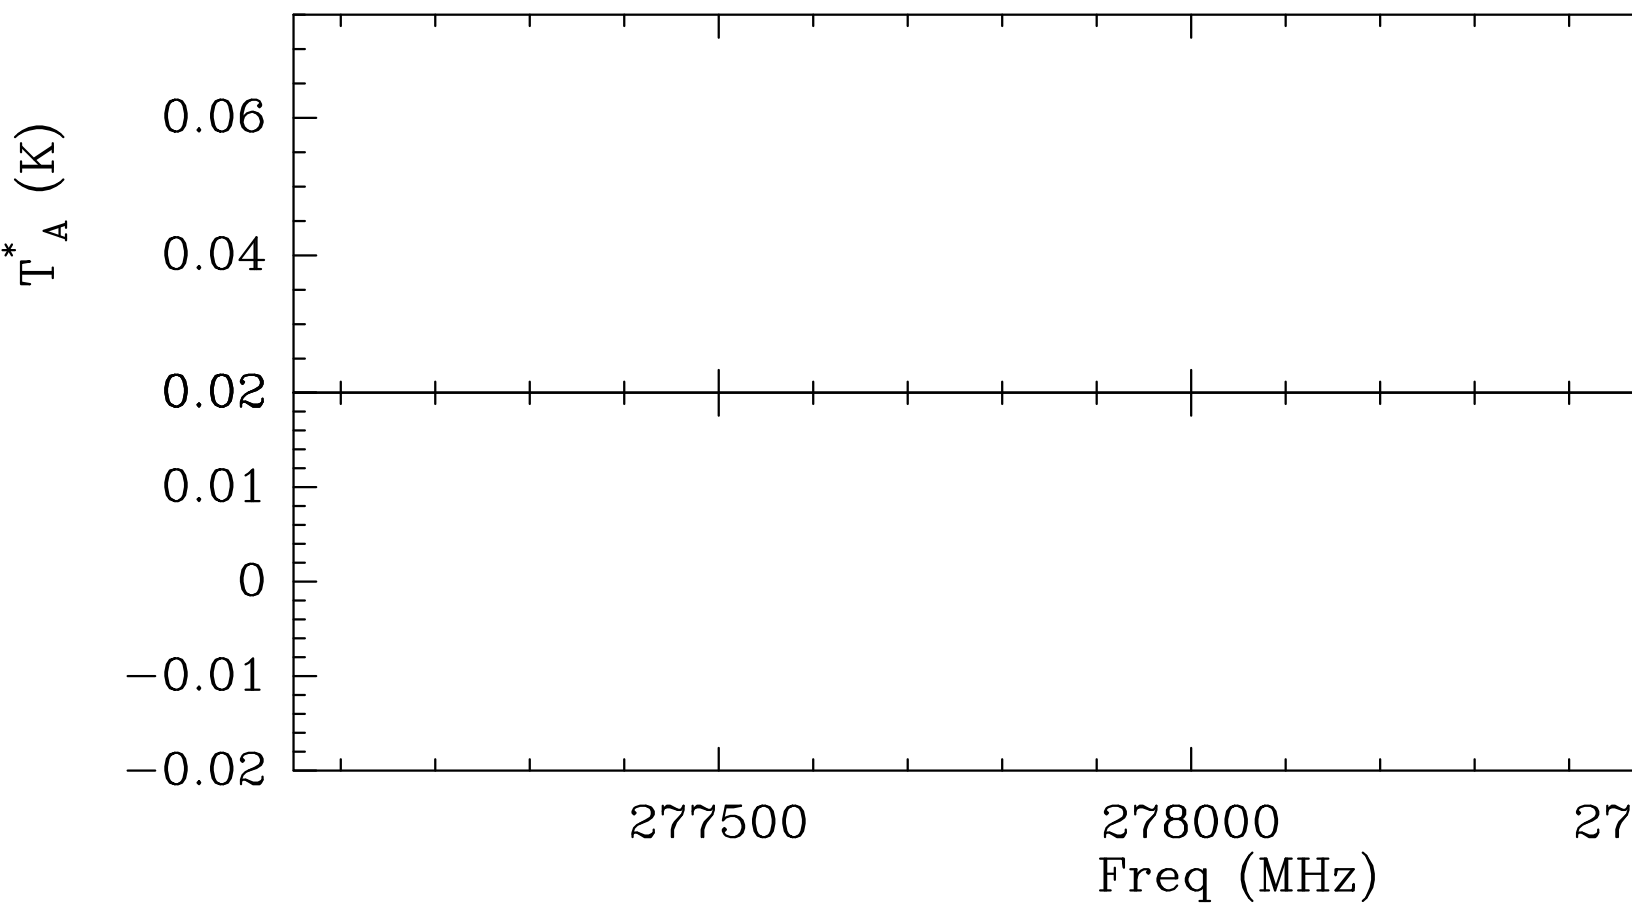

Supplement: NIHMS68662-supplement-Appendix.pdf [file NIHMS68662-supplement-Appendix.pdf]
